# Supplementary material
Source: PubMed Central journal article supplement (PMC5097880)
Supplement: NIHMS818507-supplement-1.pdf [file NIHMS818507-supplement-1.pdf]

Supplemental Figure 1

A.

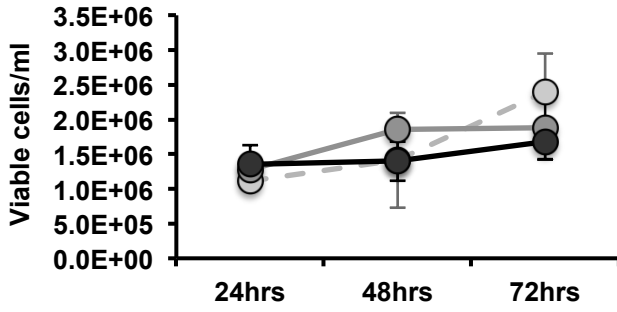

B.

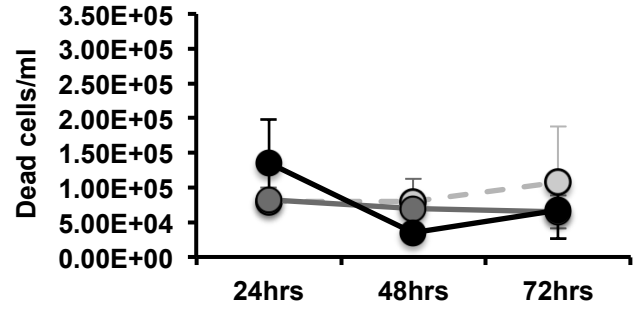

—○— Vehicle —●— Dex100nM —●— Dex 1000nM

C.

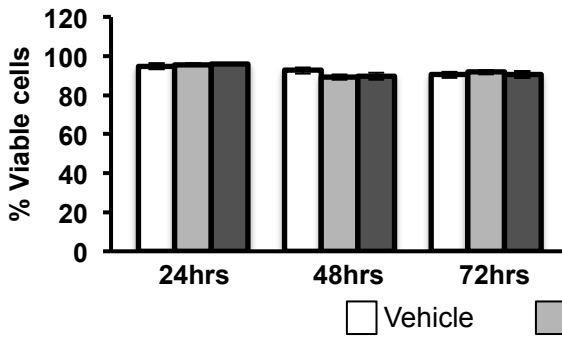

D.

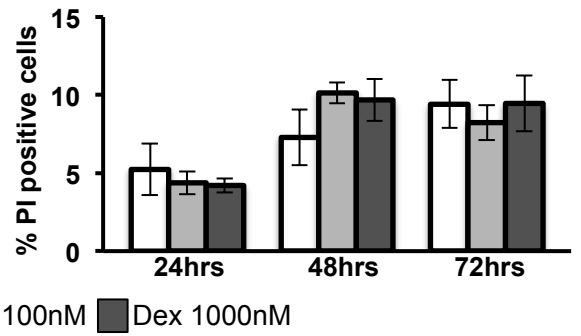

**Supplemental Table 1: Dexamethasone regulation of genes associated in diseases and functions involving lamellipodia.**

**Up regulated genes**

| Number | Symbol  | Exp Fold Change | Exp p-value |
|--------|---------|-----------------|-------------|
| 1      | BAIAP2  | 2.3504          | 8.63183E-7  |
| 2      | ARHGEF6 | 2.12256         | 0.00860316  |
| 3      | FGD4    | 2.01625         | 0.00166027  |
| 4      | ABLIM3  | 1.99287         | 4.10288E-7  |
| 5      | PVRL3   | 1.60381         | 6.32653E-4  |
| 6      | DKK3    | 1.48976         | 0.00533421  |
| 7      | CTGF    | 1.47837         | 1.91192E-4  |
| 8      | EGFR    | 1.44947         | 1.7985E-4   |
| 9      | MPRIIP  | 1.42097         | 6.53886E-4  |
| 10     | ABLIM1  | 1.39124         | 0.00405023  |
| 11     | PXN     | 1.37578         | 0.00947868  |
| 12     | TRIP10  | 1.36183         | 0.00240525  |
| 13     | TSC1    | 1.35562         | 0.00283056  |
| 14     | RHOB    | 1.33951         | 0.00311138  |
| 15     | WASF2   | 1.29785         | 0.00561289  |
| 16     | CHN1    | 1.20473         | 7.81584E-4  |
| 17     | WASF1   | 1.19908         | 0.00507991  |
| 18     | PLCG2   | 1.19            | 0.00731763  |
| 19     | SWAP70  | 1.18608         | 2.93509E-4  |

**Down Regulated genes**

| Number | Symbol    | Exp Fold Change | Exp p-value |
|--------|-----------|-----------------|-------------|
| 1      | CCL2      | -3.41548        | 2.38816E-8  |
| 2      | PLAU      | -2.90533        | 3.11871E-8  |
| 3      | SEMA3A    | -2.87725        | 1.78089E-6  |
| 4      | BDNF      | -2.2454         | 3.22154E-4  |
| 5      | GDNF      | -2.02472        | 0.00416782  |
| 6      | CD44      | -1.9183         | 0.00475893  |
| 7      | ITGB8     | -1.81877        | 1.10001E-4  |
| 8      | NGF       | -1.68514        | 2.09892E-4  |
| 9      | EGF       | -1.66451        | 0.00323076  |
| 10     | SLIT2     | -1.61888        | 1.22335E-4  |
| 11     | NRG1      | -1.5487         | 4.79405E-5  |
| 12     | PIK3CD    | -1.51461        | 5.46577E-5  |
| 13     | HSP90AA1  | -1.47258        | 0.00594811  |
| 14     | ITGA6     | -1.46736        | 3.87133E-5  |
| 15     | LCP2      | -1.42448        | 9.43781E-5  |
| 16     | AQP1      | -1.4135         | 8.56015E-4  |
| 17     | HGF       | -1.40635        | 2.09902E-4  |
| 18     | TNFRSF12A | -1.34406        | 0.00158715  |
| 19     | KNG1      | -1.32215        | 0.00156674  |
| 20     | FGF2      | -1.31569        | 4.50725E-4  |
| 21     | VAV1      | -1.30245        | 7.61495E-4  |
| 22     | EZR       | -1.25889        | 0.00796023  |
| 23     | RAC2      | -1.24535        | 0.00227561  |
| 24     | DGKG      | -1.2447         | 0.00468086  |
| 25     | CYR61     | -1.21306        | 0.00539672  |
| 26     | C1QBP     | -1.1628         | 0.00707416  |

**Supplemental Table 2: Dexamethasone regulation of genes associated in diseases and functions involving filopodia.**

**Up regulated genes**

| Number | Symbol   | Exp Fold Change | Exp p-value |
|--------|----------|-----------------|-------------|
| 1      | BAIAP2   | 2.3504          | 8.63183E-7  |
| 2      | FGD4     | 2.01625         | 0.00166027  |
| 3      | SERPINE1 | 1.89231         | 3.58885E-4  |
| 4      | MTSS1    | 1.87278         | 6.78846E-6  |
| 5      | SRGAP3   | 1.87162         | 0.0013897   |
| 6      | CSF1     | 1.69629         | 0.00105613  |
| 7      | KDR      | 1.69116         | 0.00165353  |
| 8      | PVRL3    | 1.60381         | 6.32653E-4  |
| 9      | CRMP1    | 1.55331         | 0.00864449  |
| 10     | AKAP12   | 1.48594         | 3.11512E-5  |
| 11     | CTGF     | 1.47837         | 1.91192E-4  |
| 12     | TSC1     | 1.35562         | 0.00283056  |
| 13     | TNFRSF1A | 1.34708         | 0.00590279  |
| 14     | ZMYND8   | 1.34707         | 5.62107E-4  |
| 15     | SIRPA    | 1.3081          | 9.38194E-5  |
| 16     | WASF2    | 1.29785         | 0.00561289  |
| 17     | NEURL1   | 1.28481         | 2.28599E-4  |
| 18     | LIMK2    | 1.2114          | 2.34736E-4  |
| 19     | CHN1     | 1.20473         | 7.81584E-4  |
| 20     | PLCG2    | 1.19            | 0.00731763  |
| 21     | CDC42BPB | 1.16052         | 1.8909E-4   |

**Down Regulated genes**

| Number | Symbol  | Exp Fold Change | Exp p-value |
|--------|---------|-----------------|-------------|
| 1      | IL1B    | -3.74371        | 5.55629E-10 |
| 2      | CCL2    | -3.41548        | 2.38816E-8  |
| 3      | CXCL8   | -2.91859        | 0.00718119  |
| 4      | BDNF    | -2.2454         | 3.22154E-4  |
| 5      | GDF15   | -1.82966        | 4.4335E-5   |
| 6      | VEGFA   | -1.74782        | 0.00154423  |
| 7      | DAAM1   | -1.6929         | 2.33055E-8  |
| 8      | NGF     | -1.68514        | 2.09892E-4  |
| 9      | TM4SF1  | -1.60547        | 2.45856E-4  |
| 10     | RHOF    | -1.60098        | 1.3485E-4   |
| 11     | MYO10   | -1.55431        | 4.9701E-6   |
| 12     | NRG1    | -1.5487         | 4.79405E-5  |
| 13     | ITGA6   | -1.46736        | 3.87133E-5  |
| 14     | HTR7    | -1.45507        | 4.83415E-5  |
| 15     | PTK2    | -1.44795        | 0.0079358   |
| 16     | LCP2    | -1.42448        | 9.43781E-5  |
| 17     | PACSIN1 | -1.41945        | 0.0032234   |
| 18     | HGF     | -1.40635        | 2.09902E-4  |
| 19     | PAK7    | -1.37103        | 0.00589045  |
| 20     | ICAM5   | -1.37087        | 5.12886E-4  |
| 21     | KNG1    | -1.32215        | 0.00156674  |
| 22     | FGF2    | -1.31569        | 4.50725E-4  |
| 23     | EPHX2   | -1.28944        | 0.00431031  |
| 24     | PPP1R9A | -1.2724         | 0.00222753  |
| 25     | EZR     | -1.25889        | 0.00796023  |
| 26     | MIEN1   | -1.2349         | 4.70729E-4  |
| 27     | MYO3B   | -1.21343        | 0.00595588  |
| 28     | CYR61   | -1.21306        | 0.00539672  |
| 29     | PTEN    | -1.20912        | 1.65806E-4  |
| 30     | PPP1R9B | -1.20867        | 1.85981E-4  |
| 31     | FGD3    | -1.1831         | 0.00464527  |
| 32     | PI4KB   | -1.167          | 0.0056387   |
| 33     | NINJ1   | -1.14059        | 0.00172534  |
| 34     | IQUB    | -1.09258        | 0.00454985  |

**Supplemental Table 3: Dexamethasone regulation of genes associated in diseases and functions involving permeability**

**Up regulated genes**

| Number | Symbol   | Exp Fold Change | Exp p-value |
|--------|----------|-----------------|-------------|
| 1      | PRKG1    | 3.7749          | 6.92117E-6  |
| 2      | PTGS2    | 3.6601          | 1.36906E-7  |
| 3      | PLAT     | 3.26515         | 4.79017E-10 |
| 4      | SERPINE1 | 1.89231         | 3.58885E-4  |
| 5      | ESAM     | 1.8895          | 0.00801538  |
| 6      | DMD      | 1.70442         | 0.00270604  |
| 7      | KDR      | 1.69116         | 0.00165353  |
| 8      | PRSS8    | 1.68866         | 9.35401E-4  |
| 9      | CRHR2    | 1.44213         | 0.00886579  |
| 10     | PXN      | 1.37578         | 0.00947868  |
| 11     | TNFRSF1A | 1.34708         | 0.00590279  |
| 12     | CAV1     | 1.27821         | 0.00130795  |
| 13     | ATF2     | 1.26929         | 0.00450945  |
| 14     | GADD45A  | 1.23381         | 0.0017302   |
| 15     | MAPK7    | 1.14122         | 0.00994044  |
| 16     | SELP     | 1.06242         | 0.00398049  |

**Down Regulated genes**

| Number | Symbol    | Exp Fold Change | Exp p-value |
|--------|-----------|-----------------|-------------|
| 1      | IL1B      | -3.74371        | 5.55629E-10 |
| 2      | TRPC4     | -3.47622        | 3.55485E-11 |
| 3      | CXCL8     | -2.91859        | 0.00718119  |
| 4      | PLAU      | -2.90533        | 3.11871E-8  |
| 5      | NPPB      | -2.41923        | 4.53185E-8  |
| 6      | CCL3      | -2.2262         | 2.02315E-6  |
| 7      | F3        | -2.05004        | 1.14942E-5  |
| 8      | BDKRB2    | -1.96909        | 6.87957E-7  |
| 9      | CLDN1     | -1.95484        | 7.20329E-5  |
| 10     | VEGFA     | -1.74782        | 0.00154423  |
| 11     | NGF       | -1.68514        | 2.09892E-4  |
| 12     | VEGFC     | -1.67461        | 1.85824E-7  |
| 13     | PTX3      | -1.65079        | 4.19167E-6  |
| 14     | MMP2      | -1.48914        | 0.00839088  |
| 15     | LDLR      | -1.48242        | 1.73334E-4  |
| 16     | FGFBP3    | -1.426          | 0.00671407  |
| 17     | AQP1      | -1.4135         | 8.56015E-4  |
| 18     | ICAM1     | -1.40688        | 1.17318E-5  |
| 19     | ADORA3    | -1.39827        | 7.81538E-5  |
| 20     | CXCL2     | -1.38857        | 0.00781852  |
| 21     | DTNA      | -1.38237        | 3.66917E-4  |
| 22     | TNFRSF12A | -1.34406        | 0.00158715  |
| 23     | KNG1      | -1.32215        | 0.00156674  |
| 24     | FGF2      | -1.31569        | 4.50725E-4  |
| 25     | PIK3CG    | -1.31388        | 7.96332E-4  |
| 26     | OCLN      | -1.25226        | 0.00164081  |
| 27     | RAG1      | -1.2303         | 0.00748632  |
| 28     | PTEN      | -1.20912        | 1.65806E-4  |
| 29     | ANXA1     | -1.19311        | 0.00565486  |
| 30     | TAC1      | -1.18419        | 4.62211E-4  |
| 31     | NR3C1     | -1.16742        | 0.00917959  |
| 32     | IQUB      | -1.09258        | 0.00454985  |
| 33     | AQP4      | -1.08643        | 0.00423764  |
| 34     | PECAM1    | -1.06057        | 6.55198E-4  |

**Supplemental Movie:**

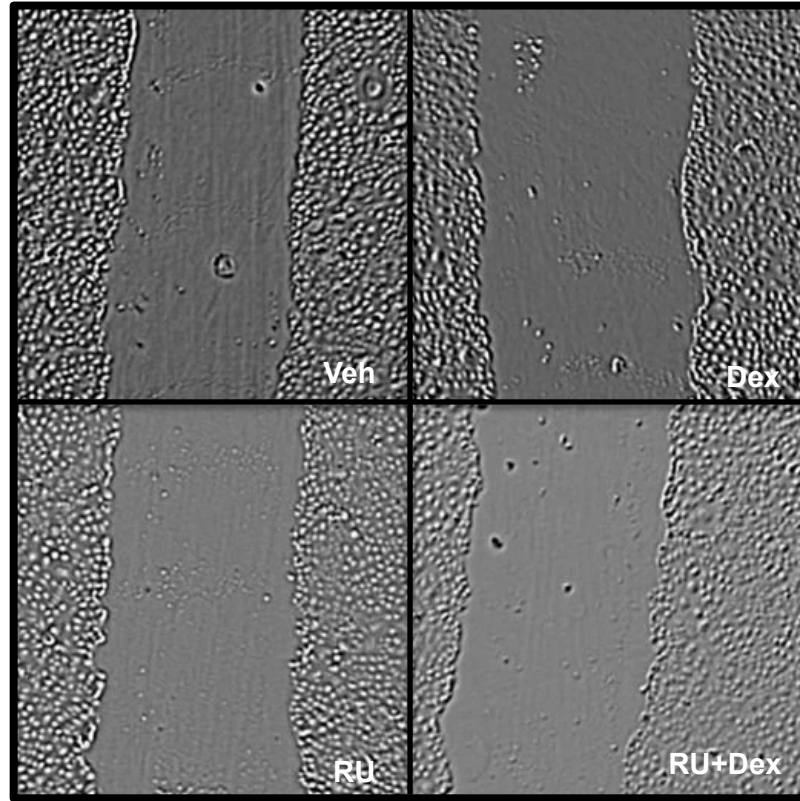

Movie of real-time wound healing of treated HCE cells over a period of 18 hours post wounding. Treatments were with vehicle (top left), 1000nM Dex (top right), 10uM RU486 (bottom left) and RU + Dex (bottom right).
